1 **A nucleus-like compartment shields bacteriophage DNA**  
2 **from CRISPR-Cas and restriction nucleases**

3  
4 Senén D. Mendoza<sup>1</sup>, Joel D. Berry<sup>1</sup>, Eliza S. Nieweglowska<sup>2</sup>,  
5 Lina M. Leon<sup>1</sup>, David A. Agard<sup>2,3</sup>, Joseph Bondy-Denomy<sup>1,3\*</sup>

6  
7 <sup>1</sup>Department of Microbiology and Immunology, University of California San Francisco, CA  
8 94143, USA

9 <sup>2</sup>Howard Hughes Medical Institute (HHMI) and the Department of Biochemistry and Biophysics,  
10 University of California San Francisco, San Francisco, CA 94158, USA

11 <sup>3</sup>Quantitative Biosciences Institute, University of California San Francisco, CA 94143, USA

12

13 \*Correspondence: [joseph.bondy-denomy@ucsf.edu](mailto:joseph.bondy-denomy@ucsf.edu)

14 **All viruses require strategies to inhibit or evade the immunity pathways of cells they**  
15 **infect. The viruses that infect bacteria, bacteriophages (phages), must avoid nucleic-acid**  
16 **targeting immune pathways such as CRISPR-Cas and restriction endonucleases to**  
17 **replicate efficiently<sup>1</sup>. Here, we show that a jumbo phage infecting *Pseudomonas***  
18 ***aeruginosa*, phage  $\Phi$ KZ, is resistant to many immune systems *in vivo*, including CRISPR-**  
19 **Cas3 (Type I-C), Cas9 (Type II-A), Cas12 (Cpf1, Type V-A), and Type I restriction-**  
20 **modification (R-M) systems. We propose that  $\Phi$ KZ utilizes a nucleus-like shell to protect**  
21 **its DNA from attack. Supporting this, we demonstrate that Cas9 is able to cleave  $\Phi$ KZ**  
22 **DNA *in vitro*, but not *in vivo* and that Cas9 is physically occluded from the shell**  
23 **assembled by the phage during infection. Moreover, we demonstrate that the Achilles**  
24 **heel for this phage is the mRNA, as translation occurs outside of the shell, rendering the**  
25 **phage sensitive to the RNA targeting CRISPR-Cas enzyme, Cas13a (C2c2, Type VI-A).**  
26 **Collectively, we propose that the nucleus-like shell assembled by jumbo phages enables**  
27 **potent, broad spectrum evasion of DNA-targeting nucleases.**

28  
29 Phage infection and replication can cause bacterial death via cell lysis, necessitating protective  
30 immune systems to negate this great threat to bacterial viability<sup>2,3</sup>. Restriction-modification (R-  
31 M) and adaptive CRISPR-Cas (clustered regularly interspaced short palindromic repeats and  
32 CRISPR-associated genes) immunity detect and degrade phage nucleic acids to protect the  
33 host<sup>1</sup>. Recent CRISPR-Cas discovery efforts have led to the characterization of six distinct  
34 CRISPR-Cas types (I-VI) with independent mechanisms for CRISPR RNA (crRNA) biogenesis,  
35 surveillance complex assembly, substrate selection, and target degradation<sup>4</sup>. Type III and VI  
36 CRISPR-Cas systems target RNA<sup>5,6</sup>, while Types I, II, and V predominantly target DNA<sup>7-9</sup>.  
37 Despite these differences, all characterized CRISPR-Cas systems function via crRNA-guides  
38 derived from the DNA-based CRISPR array, which stores the memory of past infections<sup>10,11</sup>.

39  
40 Phages that infect *Pseudomonas aeruginosa* avoid CRISPR-mediated destruction by encoding  
41 "anti-CRISPR" (Acr) proteins that inhibit the Type I-E and I-F CRISPR-Cas systems<sup>12-14</sup>. We  
42 sought to determine whether any *P. aeruginosa* phages are also resistant to the Type I-C  
43 CRISPR-Cas subtype, also present in *P. aeruginosa*<sup>15</sup>. This subtype is notable as it is the most  
44 minimal Type I system identified to date, is highly abundant in bacterial genomes<sup>16</sup>, and is  
45 understudied relative to other subtypes. We identified an isolate in our lab encoding a Type I-C  
46 system, and designed and expressed a crRNA targeting related phages JBD30 and DMS3m,  
47 which encode AcrIF and AcrIE proteins, respectively. The successful crRNA-specific targeting of

48 these phages by the Type I-C system demonstrated functional CRISPR immunity and that these  
49 phages did not possess functional Type I-C Acr proteins (Fig. 1a). To test the sensitivity of other  
50 phage families against the Type I-C system, we transferred the necessary *cas* genes (*cas3*,  
51 *cas5*, *cas8*, *cas7*) into the chromosome of a commonly used, phage-sensitive lab strain (PAO1)  
52 that naturally lacks CRISPR-Cas immunity. A small screen was then conducted, where crRNAs  
53 were tested against phages from five taxonomic groups: JBD30, D3,  $\Phi$ KZ, F8, and JBD68.  
54 JBD30, D3, and JBD68 are distinct temperate siphophages while  $\Phi$ KZ and F8 are distinct lytic  
55 myophages. All phages succumbed to targeting, except  $\Phi$ KZ (Fig. 1b, 1c).  $\Phi$ KZ titer did not  
56 decrease when exposed to ten different Type I-C crRNAs (Fig. 1c, Extended Data Fig. 1),  
57 suggesting that it is completely resistant to this immune system of *P. aeruginosa*.

58  
59 The  $\Phi$ KZ genome possesses no homologs of *acr* genes<sup>12-14,17,18</sup> or anti-CRISPR associated  
60 (*aca*) genes that have previously enabled identification of *acr* genes<sup>14,17,18</sup>. Moreover,  $\Phi$ KZ is a  
61 phage with no genetic tools currently available to manipulate it, rendering traditional knockout  
62 approaches infeasible. Thus to determine the mechanism by which the  $\Phi$ KZ phage resists Type  
63 I CRISPR-Cas, we attempted to utilize the Type II-A CRISPR-Cas9 system from *Streptococcus*  
64 *pyogenes* (SpyCas9) to knock out phage genes. SpyCas9 and sgRNAs were adapted for  
65 expression and function in *P. aeruginosa*, leading to robust targeting of control phage JBD30,  
66 but notably,  $\Phi$ KZ replication and associated cell lysis was unaffected both in plate and liquid  
67 assays (Fig. 2a). An additional eight sgRNA sequences also failed to target  $\Phi$ KZ (Extended  
68 Data Fig. 2a), suggesting that  $\Phi$ KZ resists both Type I and II CRISPR immunity. Given the  
69 ability of this phage to evade two unrelated CRISPR systems originating from distantly related  
70 microbes, we considered that it may be generally resistant CRISPR-Cas immunity. To test this,  
71 the Type V-A Cas12a (Cpf1) CRISPR-Cas system from *Moraxella bovoculi* was expressed in *P.*  
72 *aeruginosa* and again, robust targeting of phage JBD30 was observed, but not of  $\Phi$ KZ with any  
73 of the nine crRNAs tested (Fig. 2b, Extended Data Fig. 2b). The ability of this phage to resist  
74 CRISPR systems found in its natural host (Type I-C) and those not present in *Pseudomonas*  
75 (Type II-A and V-A) suggests that this phage possesses a mechanism to enable “pan-CRISPR”  
76 resistance.

77  
78 Restriction-modification systems are the most common bacterial immune system in nature and  
79 pose a significant impediment to phage replication<sup>1</sup>. To test whether  $\Phi$ KZ is also resistant to  
80 attack from restriction endonucleases, the phage was propagated on strain PAK, an isolate that  
81 generates phages that are restricted by strain PAO1. When phage JBD30 was propagated on

82 PAK, and then plated on strain PAO1, its titer was reduced by ~3 orders of magnitude (Fig. 2c),  
83 an effect that was ameliorated in a PAO1 strain lacking the Type I R-M system ( $\Delta hsdR$ ).  
84 However, when  $\Phi$ KZ was propagated on PAK, its titer did not decrease on PAO1 (Fig. 2c).  
85 Conversely, when propagated on PAO1,  $\Phi$ KZ titer was not decreased on PAK, while JBD30  
86 was again reduced in titer by ~3 orders of magnitude (Fig. 2c). This demonstrates that  $\Phi$ KZ is  
87 also recalcitrant to Type I restriction endonucleases *in vivo*.

88  
89 Given the strong resistance to targeting, we considered whether DNA base modifications were  
90 protecting this phage from enzyme targeting, as has been previously seen with phage T4 and  
91 others<sup>19-22</sup>. Purified phage DNA, extracted from  $\Phi$ KZ virions, was subjected to restriction  
92 digestion reactions with a panel of restriction enzymes that are inhibited by glc-HmC moieties,  
93 including HindIII, EcoRI, SmaI, KpnI, NcoI, and EcoRI (ref. 22,23 and per New England Biolabs).  
94 Additionally, MspJI was utilized, a modification-dependent restriction nuclease that requires 5-  
95 HmC or 5-mC modified DNA for cleavage<sup>24</sup>. Except for SmaI, which lacks a sequence  
96 recognition motif in the  $\Phi$ KZ genome, all enzymes tested cleaved  $\Phi$ KZ gDNA, demonstrating  
97 the absence of glc-HmC modifications (Fig. 3a). To determine whether the phage genome is a  
98 substrate for CRISPR-Cas9-based cleavage, purified phage DNA was subjected to a cleavage  
99 assay with two distinct crRNA sequences using a dual crRNA:tracrRNA-loaded SpyCas9  
100 nuclease *in vitro*. Cas9 cleaved the phage genome in two locations, liberating the predicted 10  
101 kb fragment from the much larger 280 kb genome (Fig. 3b). Notably, the two crRNA sequences  
102 used here are the same sequence as crRNAs II-A, #1 and II-A, #2 used *in vivo* (Fig. 2a),  
103 demonstrating that these crRNA sequences do not target phage *in vivo*, but are competent for  
104 genome cleavage *in vitro*.

105  
106 Recently it was shown that  $\Phi$ KZ and  $\Phi$ KZ-like phages infecting *Pseudomonas* sp. construct an  
107 elaborate nucleus-like, proteinaceous compartment where phage DNA replicates, with PhuZ, a  
108 phage tubulin homologue, centering the compartment within the host cell<sup>25-29</sup>. Proteins involved  
109 in DNA replication and transcription localize inside the shell, while proteins mediating translation  
110 and nucleotide synthesis are relegated to the cytoplasmic space, akin to the eukaryotic nucleus.  
111 Given the rapid assembly of the shell and its apparent exclusion of select proteins, we  
112 considered whether this structure was responsible for the resistance of  $\Phi$ KZ to four unrelated  
113 CRISPR-Cas and restriction nucleases. The Type II-A single protein effector Cas9 was chosen  
114 as a representative immune system for ease of manipulation and imaging. *P. aeruginosa* cells  
115 infected with  $\Phi$ KZ were imaged with a Cas9 fluorescent antibody, revealing that the protein is



116 indeed excluded from the shell during phage infection (Fig. 4a). DAPI staining reveals the phage  
117 DNA inside the nucleus-like shell, while the host genome is rapidly degraded during infection.  
118 As a control, a protein previously shown to be internalized in the shell, ORF152, was imaged  
119 revealing co-localization with the DAPI-positive phage nucleus. While the rules for protein  
120 internalization in the shell are currently unknown, these data and work from the initial shell  
121 studies<sup>28,29</sup> suggest that the default localization for large host-encoded proteins is to be  
122 excluded from the shell.

123

124 While  $\Phi$ KZ DNA is protected from CRISPR-Cas and restriction endonucleases, the mRNA is not  
125 afforded this same luxury, as it leaves the confines of the shell to be translated in the cytoplasm.  
126 We therefore envisaged that an RNA-targeting CRISPR-Cas system would provide immunity to  
127  $\Phi$ KZ even if localized in the cytoplasm. To test this, we adapted the RNA-guided RNA nuclease  
128 Cas13a (C2c2, Type VI-A) from *Listeria seeligeri*<sup>5,30</sup> for phage targeting in *P. aeruginosa*. By  
129 targeting several different transcripts, three LseCas13 spacers were found (two targeting tail  
130 gene *gp146* and one targeting the shell gene *gp054*) that decreased  $\Phi$ KZ plaquing efficiency by  
131 10-1000-fold (Fig. 4b, Extended Data Fig. 3). Corroborating the plaquing results, LseCas13 also  
132 provided protection of *P. aeruginosa* in liquid cultures, with strong bacterial growth at phage  
133 inputs that kill cultures with a non-targeting spacer (Fig. 4c). The sensitivity of  $\Phi$ KZ to RNA-  
134 targeting but not DNA-targeting underscores the role of the shell in broad spectrum resistance  
135 to DNA-cleaving enzymes and also provides the first evidence of a DNA phage being inhibited  
136 by Cas13.

137

138 Evasion of the endogenous *P. aeruginosa* Type I CRISPR-Cas system by  $\Phi$ KZ suggests that  
139 these jumbo phages are likely to pervasively avoid this system in nature. Supporting this  
140 hypothesis, our analysis of >4,000 *P. aeruginosa* non-redundant spacers (Type I-C, I-E, and I-F)  
141 reported by van Belkum et al. (2015) found no spacers against  $\Phi$ KZ, or its jumbo phage  
142 relatives  $\Phi$ PA3, PaBG, KTN4, and PA7 (Table 1). This is in contrast to the many spacer  
143 matches from each system against diverse *P. aeruginosa* phages, such as those assayed in our  
144 screen and those encoding anti-CRISPR proteins (Table 1). Finally, given the efficacy of the  
145 RNA-targeting CRISPR-Cas13 system, we propose that perhaps these CRISPR systems are  
146 well-suited to target the mRNA of DNA phages when the DNA is inaccessible (i.e. due to base  
147 modifications or physical segregation). However, the rules governing the ability of Cas13 to limit  
148 the replication of DNA phages remain to be elucidated as only 3/11 LseCas13a crRNAs tested  
149 targeted  $\Phi$ KZ and 0/6 were effective at targeting phage JBD30 (Extended Data Fig. 3).

150

151 Here, we searched for CRISPR-Cas resistant phages by designing crRNAs against them and  
152 testing their efficacy. This screen identified jumbo phage  $\Phi$ KZ (genome size: 280,334 bp<sup>31</sup>) as  
153 resistant to the Type I-C CRISPR system, and subsequently to Type II-A and Type V-A single  
154 effector nucleases Cas9 and Cas12.  $\Phi$ KZ is also recalcitrant to the Type I restriction-  
155 modification system of *P. aeruginosa*. Despite this apparent resistance *in vivo*,  $\Phi$ KZ genomic  
156 DNA is sensitive to restriction enzymes and Cas9 cleavage *in vitro*. We propose that the  
157 assembly of a proteinaceous compartment to house the replicating phage DNA creates a  
158 physical protective barrier resulting in the resistance of phage  $\Phi$ KZ to DNA-cleaving enzymes  
159 (Fig. 4d). Although this shell-like structure has only been documented among the jumbo phages  
160 of *Pseudomonas*<sup>28,29</sup>, we consider that physical occlusion of phage genomic DNA through this  
161 and other mechanisms may comprise a novel route to immune system evasion in bacteria.

162

163 The pan-resistance of  $\Phi$ KZ to DNA-targeting enzymes provides an explanation for the elaborate  
164 and impressive shell structure, and suggests that the phage DNA may never be exposed to the  
165 cytoplasm. Other hypotheses to describe the shell's existence remain to be addressed,  
166 including protection from phage-derived nucleases that degrade the bacterial genome or as a  
167 mechanism to spatially restrict the large phage genome during replication and packaging.  
168 Regardless, we conclude that the nucleus-like shell provides a strong protective barrier to DNA-  
169 targeting immune pathways. We expect that simple CRISPR-based screens, such as the one  
170 conducted here, may reveal many other fascinating mechanisms that phages have evolved to  
171 ensure their replicative success when faced with immune systems to overcome.

172

173

174 **Acknowledgements:**

175 Research in the Bondy-Denomy lab was supported by the University of California San Francisco  
176 Program for Breakthrough in Biomedical Research, funded in part by the Sandler Foundation,  
177 and an NIH Office of the Director Early Independence Award (DP5-OD021344). This work was  
178 also supported by HHMI (DAA) and NIH grants R35GM118099 (DAA), and GM104556 (DAA).

179

180  $\Phi$ KZ, JBD30, JBD68, D3, and F8 were provided by Alan Davidson's lab. Phage DMS3m was a  
181 gift from the O'Toole lab and Jason M. Peters and Carol A. Gross provided the *S. pyogenes*  
182 *cas9* expression plasmid for integration in the PAO1 chromosome. pTE4495  
183 (MbCpf1/MbCas12a) was a gift from Ervin Welker (Addgene plasmid # 80339), and LseCas13a  
184 (Addgene plasmid #83486) is a gift from Jennifer Doudna.

185

186 **Author Contributions:**

187 S.D.M. conducted restriction-modification experiments, constructed Cas13 strains and  
188 conducted associated experiments with that strain and the Cas12 strain, including all liquid  
189 infection assays, and prepared figures. J.D.B. constructed and conducted experiments with  
190 Cas9 and Cas12 expressing strains, and conducted *in vitro* digestion assays. L.M.L. conducted  
191 Type I-C Cas3 experiments. J.B.-D. conceived of the project, conducted Cas3 and Cas9  
192 experiments, supervised all experiments, and wrote the manuscript together with S.D.M. E.S.N.  
193 conducted microscopy experiments, under the supervision of D.A.A. All authors edited the  
194 manuscript.

195

196 **Competing Interests:**

197 None to declare

198

199 **Materials & Correspondence:**

200 Requests should be made to [joseph.bondy-denomy@ucsf.edu](mailto:joseph.bondy-denomy@ucsf.edu)

201

202 **Figures:**

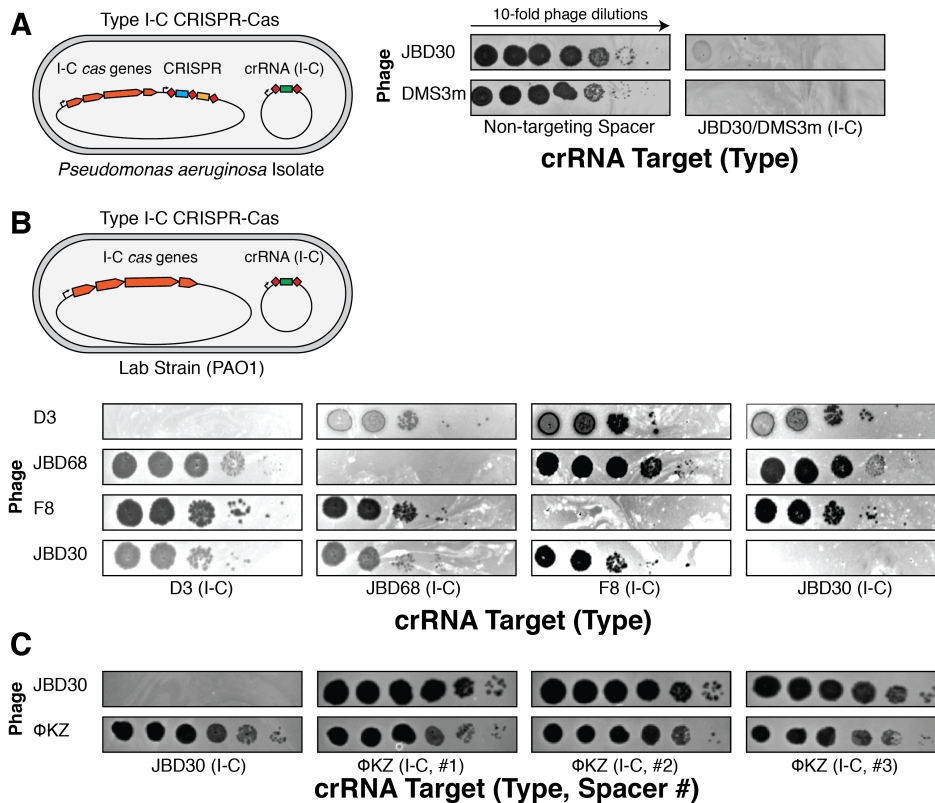

203  
204 **Figure 1: Identification of a phage that resists *P. aeruginosa* Type I-C CRISPR-Cas**  
205 **immunity.** **a**, Phages JBD30 and DMS3m were spotted in ten-fold serial dilutions on a lawn of a  
206 *P. aeruginosa* isolate naturally expressing the I-C cas genes, and an engineered crRNA to  
207 target both phages. Dark clearings in the lawn represent phage replication. **b**, Strain PAO1 was  
208 engineered to express the I-C cas genes and crRNAs targeting the indicated phages, and  
209 plaque assays were conducted as in Fig. 1a. **c**, PAO1 strains expressing crRNAs engineered to  
210 target phage JBD30 and phage ΦKZ (I-C, #1-#3) were subjected to a plaque assay as in Fig.  
211 1a.  
212  
213

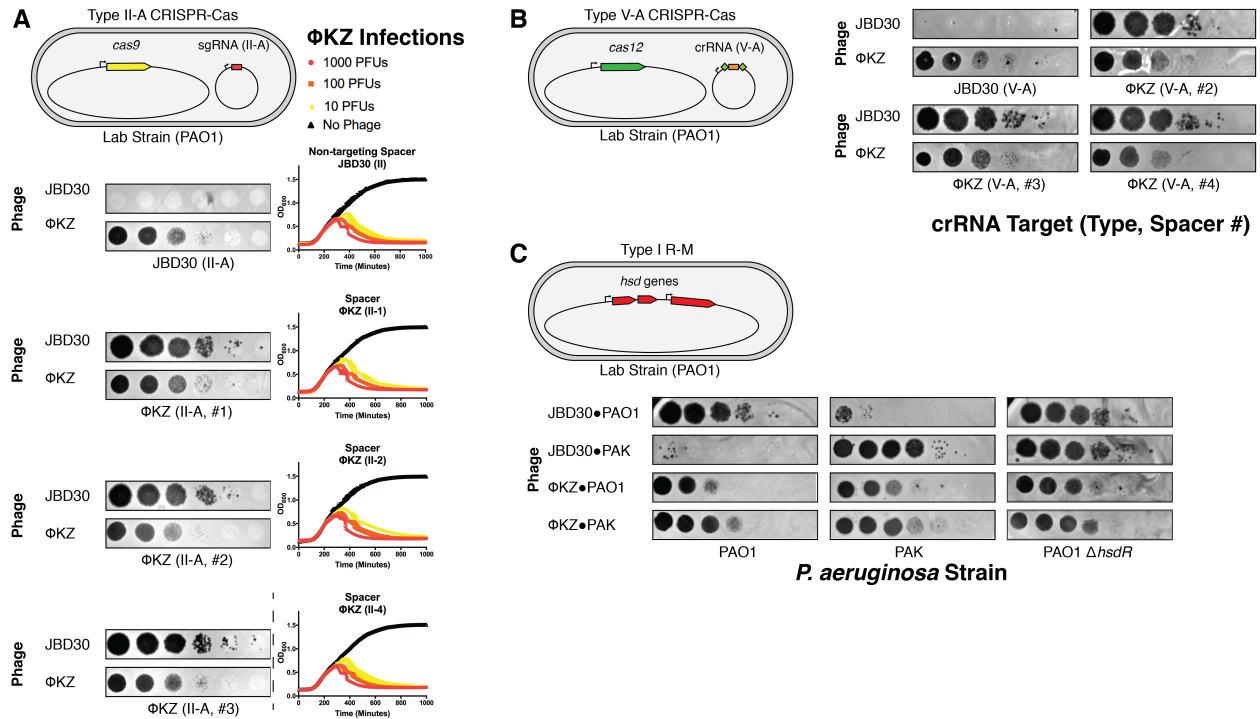

214  
 215  
 216  
 217  
 218  
 219  
 220  
 221  
 222  
 223  
 224  
 225  
 226

**crRNA Target (Type, Spacer #)**  
**Figure 2: Jumbo phage ΦKZ resists targeting by heterologous Type II-A and V-A CRISPR-Cas systems and an endogenous R-M system.** **a**, Strain PAO1 was engineered to express the Type II-A Cas9 protein and single guide RNAs (sgRNAs) targeting the indicated phage. Plaque assays were conducted as in Figure 1a and growth curves were conducted, monitoring the OD<sub>600</sub> of PAO1 cells infected with the indicated number of ΦKZ plaque forming units (pfu). **b**, Strain PAO1 was engineered to express the Type V-A Cas12a protein and crRNAs against the indicated phage. Plaque assays conducted as in Figure 1a. **c**, The endogenous Type I R-M system (*hsdRSM*) in strains PAO1 and PAK was assayed using phages propagated on PAO1 or PAK as indicated (e.g. JBD30•PAO1 was first propagated on strain PAO1). Together with an isogenic PAO1Δ*hsdR* knockout, all strains were subjected to a plaque assay as in Figure 1a.

227

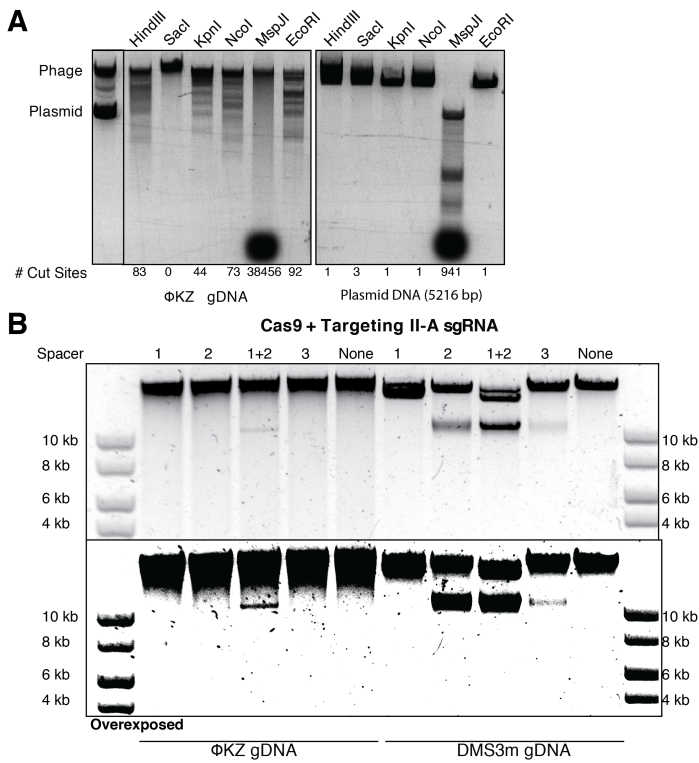

228  
229  
230  
231  
232  
233  
234  
235  
236  
237  
238

**Figure 3: ΦKZ genomic DNA is sensitive to restriction enzymes and Cas9 *in vitro*.** **a**, ΦKZ genomic DNA and plasmid DNA were subjected to digestion with the indicated restriction enzymes *in vitro*. The first lane contains purified phage and plasmid DNA run together. The number of cut sites for each enzyme is shown at the bottom of the gels. **b**, ΦKZ and phage DMS3m genomic DNA were digested *in vitro* using Cas9 loaded with crRNA:tracrRNA targeting the indicated phage. The bottom gel is the same as the top gel, however the image was overexposed to enhance faint bands. Products were visualized on a 0.7% agarose gel, visualized with SYBR Safe nucleic acid stain.

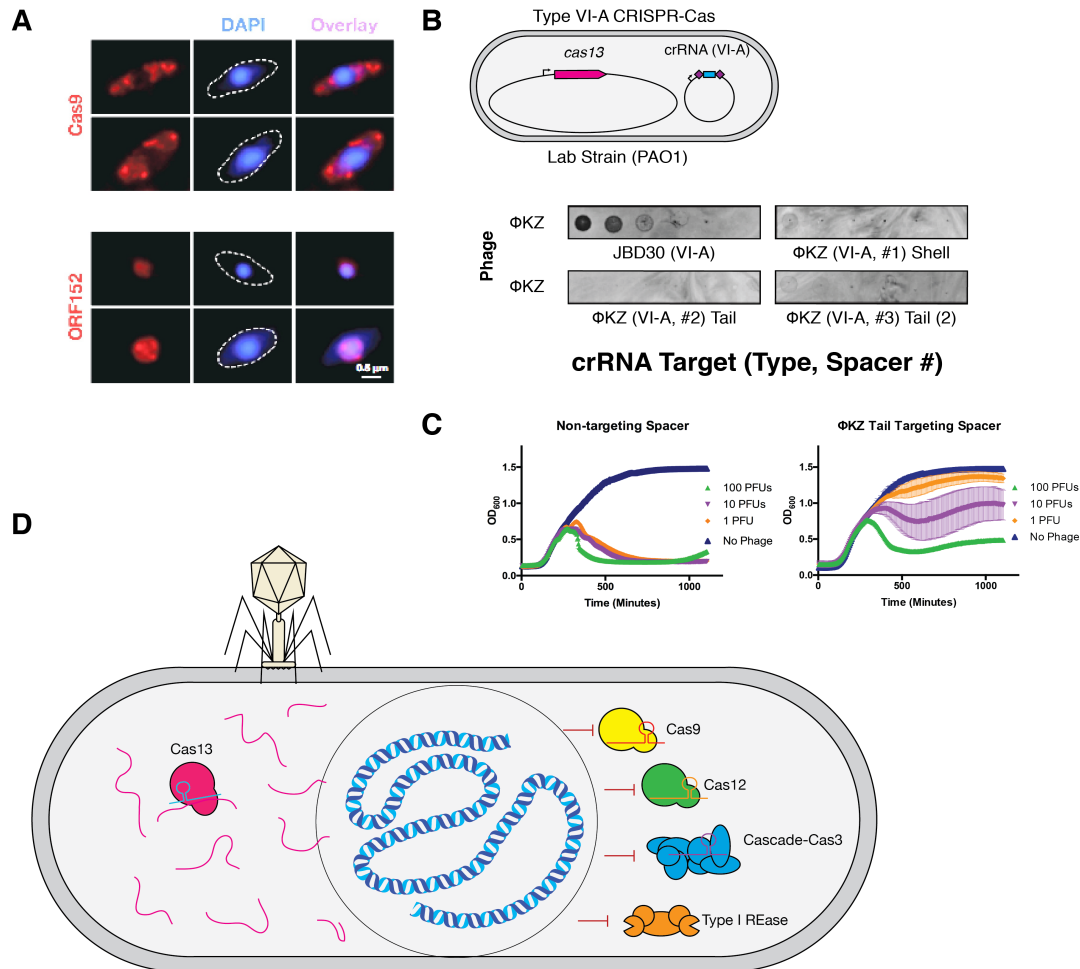

239  
 240 **Figure 4: Phage  $\Phi$ KZ DNA is protected from Cas9 and other DNA targeting enzymes, but**  
 241 **is sensitive to RNA-targeting Cas13.** a, Fluorescence microscopy of *P. aeruginosa*,  
 242 immunostained for Cas9 (top panels), or Myc-ORF152 (bottom panels). DAPI stain shows the  
 243 phage DNA within the shell. b, Strain PAO1 expressing LseCas13a and a crRNA targeting the  
 244 indicated phage. Plaque assays conducted as in Figure 1a. c, Growth curves measuring the  
 245 OD<sub>600</sub> of PAO1 infected with the indicated number of  $\Phi$ KZ plaque forming units (PFUs). d, A  
 246 model summarizing the  $\Phi$ KZ nucleus-like shell excluding Cas9, Cas12, Cascade-Cas3 (Type I-  
 247 C, and Type I restriction endonucleases (REase), while the mRNA (red) is exported and can be  
 248 targeted by Cas13.  
 249



250 **Tables:**

251 **Table 1:  $\Phi$ KZ and  $\Phi$ KZ-like phages have no natural spacers matching their genomes from**  
 252 **a natural collection of >4000 *P. aeruginosa* spacers.**

253 The total number of Type I CRISPR spacers with a perfect match to the indicated *P. aeruginosa*  
 254 phages assayed in this study and previous CRISPR-Cas studies. The experimental sensitivity of  
 255 each phage to the indicated subtypes are shown. AcrIE3 and AcrIF1 are I-E and I-F anti-  
 256 CRISPR proteins, respectively. \* indicates that all spacers have mismatches ( $\leq 4$ ) to the F8  
 257 genome.

| Phage     | # spacers | Type I CRISPR sensitivity                                   | Reference              |
|-----------|-----------|-------------------------------------------------------------|------------------------|
| DMS3m     | 75        | I-C: sensitive<br>I-E: resistant (AcrIE3)<br>I-F: sensitive | This study, ref. 13,33 |
| JBD30     | 51        | I-C: sensitive<br>I-E: sensitive<br>I-F: resistant (AcrIF1) | This study, ref. 12,13 |
| JBD18     | 51        | I-F: sensitive                                              | Ref. 33                |
| JBD25     | 46        | I-F: sensitive                                              | Ref. 33                |
| JBD68     | 28        | I-C: sensitive                                              | This study             |
| D3        | 49        | I-C: sensitive                                              | This study             |
| F8        | 3*        | I-C: sensitive                                              | This study             |
| $\Phi$ KZ | 0         | I-C: resistant                                              | This study             |
| phiPA3    | 0         | not assayed                                                 |                        |
| PaBG      | 0         | not assayed                                                 |                        |
| KTN4      | 0         | not assayed                                                 |                        |
| PA7       | 0         | not assayed                                                 |                        |

258

259

260 **Extended Data Figures**

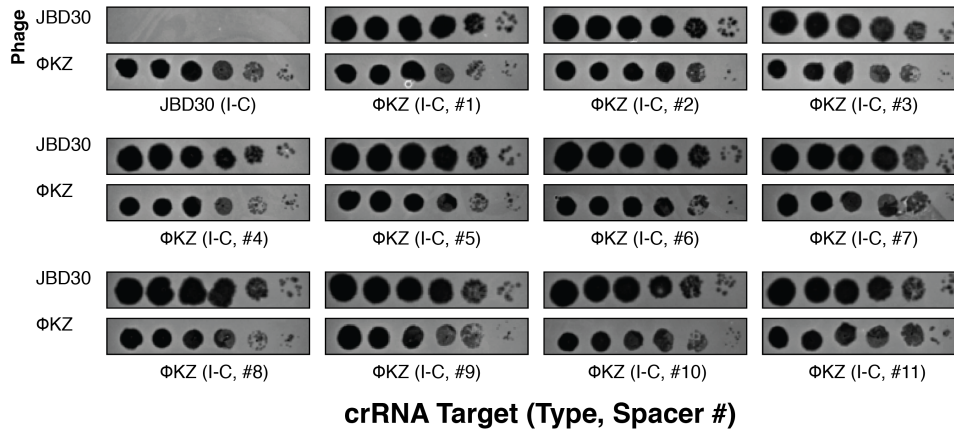

261

262 **Extended Data Figure 1: Phage ΦKZ is resistant to Type I-C CRISPR-Cas immunity.**

263 *P. aeruginosa* strain PAO1 expressing the Type I-C *cas* genes and crRNAs programmed to  
264 recognize the indicated phage. One crRNA targeting JBD30 is shown, while 11 distinct crRNAs  
265 are directed towards ΦKZ. Phages are spotted in ten-fold serial dilutions (left to right) on a lawn  
266 of the indicated PAO1 strain.

267

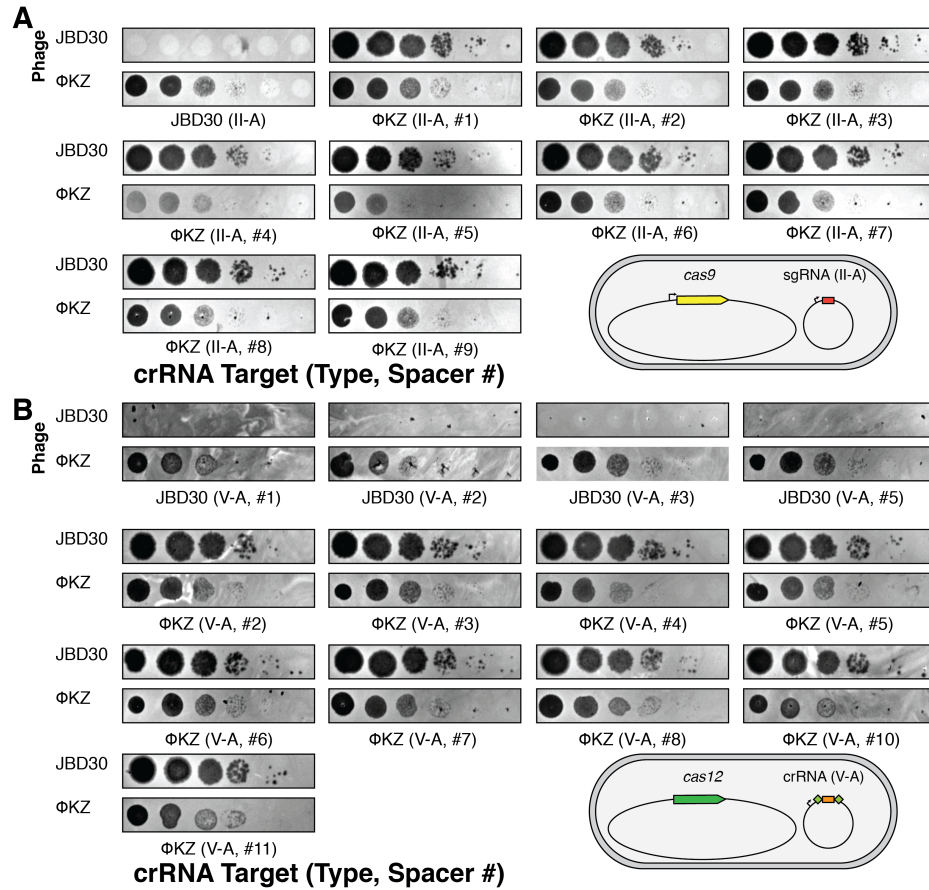

268  
269  
270  
271  
272

**Extended Data Figure 2: Phage ΦKZ is resistant to Type II-A and V-A CRISPR-Cas immunity.** *P. aeruginosa* strain PAO1 expressing the (a) Type II-A Cas9 or (b) Type V-A Cas12a effectors and sgRNAs/crRNAs programmed to recognize the indicated phage. Phages are spotted in ten-fold serial dilutions (left to right) on a lawn of the indicated PAO1 strain.

273

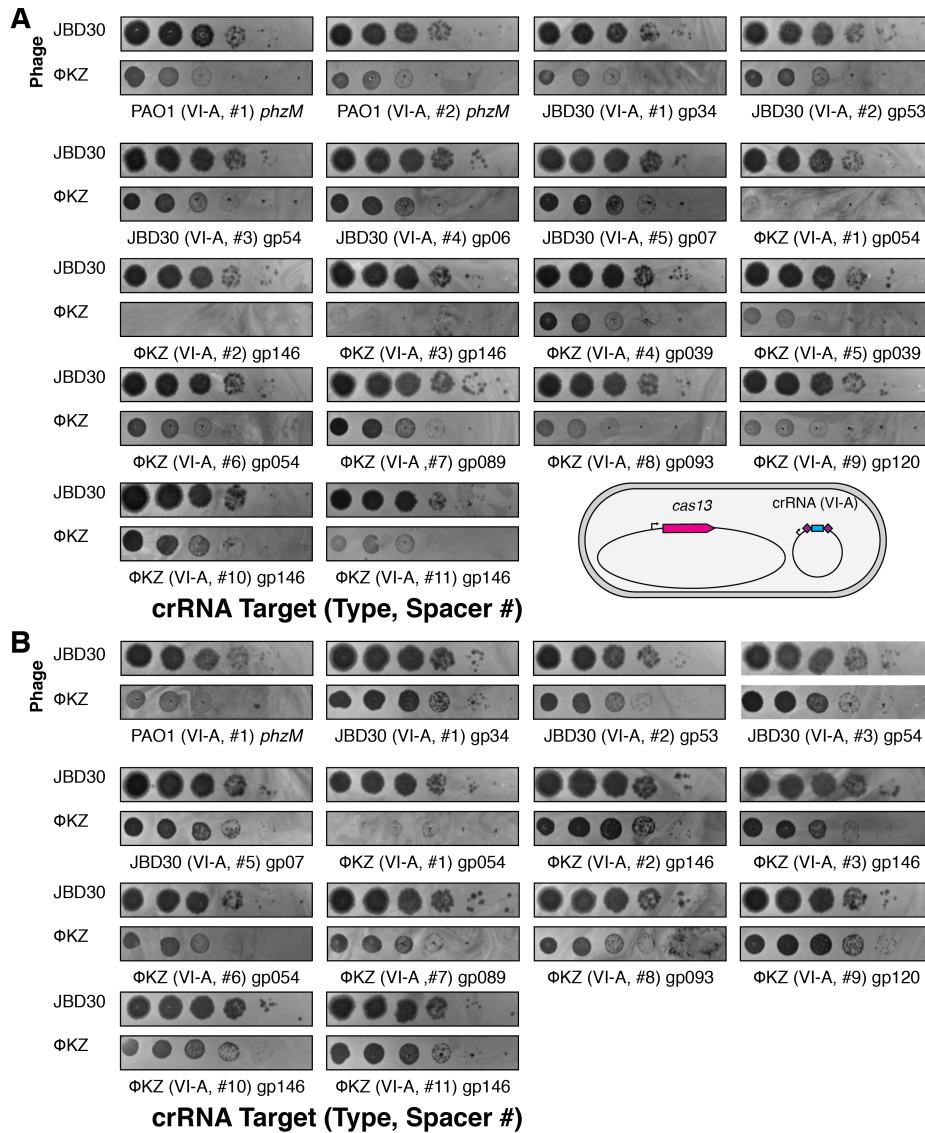

274

275

276

277

278

**Extended Data Figure 3: Phage ΦKZ is sensitive to Type VI-A CRISPR-Cas immunity.**  
*P. aeruginosa* strain PAO1 expressing the Type VI-A (a) LseCas13a or (b) LshCas13a effectors and crRNAs programmed to recognize the indicated phage. Phages are spotted in ten-fold serial dilutions (left to right) on a lawn of the indicated PAO1 strain.

## 279 **Methods**

### 280 **Bacterial growth and genetic manipulation**

281 Strains, plasmids, phages, and spacer sequences used in this study are listed in Supplemental  
282 Tables 1-4. *Pseudomonas aeruginosa* strain PAO1 was grown in LB at 37 °C with aeration at  
283 225 RPM. When necessary plating was performed on LB agar with carbenicillin (200 µg/ml) or  
284 gentamicin (50 µg/ml). Gene expression was induced by the addition of L-arabinose (0.1% final)  
285 and/or isopropyl β-D-1-thiogalactopyranoside (IPTG, 0.5 mM or 1 mM final). For chromosomal  
286 insertions at the attTn7 locus, *P. aeruginosa* cells were electroporated with the integrating  
287 vector pUC18T-lac and the transposase expressing helper plasmid pTNS3, and selected on  
288 gentamicin. Potential integrants were screened by colony PCR with primers PTn7R and PglmS-  
289 down. Electrocompetent cell preparations, transformations, integrations, selections, plasmid  
290 curing, and FLP recombinase mediated marker excision with pFLP were performed as  
291 described previously<sup>32</sup>.

292

### 293 **Phage growth and DNA extraction**

294 Phage growth was conducted in LB at 37 °C with PAO1 as a host. Growth curves were  
295 conducted in a Biotek Synergy plate reader at 37 °C with orbital shaking set to maximum speed.  
296 Phage stocks were diluted and stored in SM buffer<sup>33</sup> and used for routine plaquing assays. For  
297 high titer lysates to generate phage DNA, plates with a high number of plaques were flooded  
298 with SM buffer and collected<sup>33</sup>. The lysates were subsequently DNase treated and filtered  
299 through a 0.22 µm filter. Phage DNA was extracted with the Wizard Genomic DNA Purification  
300 Kit (Promega). DNA restriction assays were performed according to standard NEB protocols  
301 and restriction fragments were assessed by agarose gel electrophoresis.

302

### 303 **Type I-C CRISPR-Cas system expression in *P. aeruginosa* PAO1**

304 Type I-C CRISPR-Cas function was tested by electroporating a strain containing I-C cas genes  
305 with pHERD30T plasmids encoding crRNAs that target phages. To express this system  
306 heterologously in PAO1, the four effector cas genes (*cas3-5-8-7*) were cloned into pUC18T-lac  
307 and inserted in the PAO1 chromosome as described above. After removal of the gentamicin  
308 marker, this strain was electroporated with the same pHERD30T crRNA-encoding plasmids to  
309 confirm function upon IPTG/arabinose induction.

310

### 311 **crRNA cloning and expression**

312 All crRNAs used here, were cloned into established entry vectors in the pHERD30T  
313 background. After removing a pre-existing Bsal cut site in the vector by mutagenesis, a pseudo-  
314 CRISPR array (i.e. repeat-spacer-repeat for Type I, V, VI, or a sgRNA scaffold for Type II) was  
315 then cloned into the vector, where the spacing sequence possessed two inverted Bsal digest  
316 sites, to facilitate scarless cloning of new spacers. Desired spacer sequences were ordered as  
317 two complementary oligonucleotides that generate sticky ends when annealed, to be cloned into  
318 the entry vector, which was Bsal digested. Spacer oligonucleotides were PNK treated,  
319 annealed, and ligated into the entry vector.

320

### 321 **Streptococcus pyogenes (Spy) Cas9 and sgRNA expression in *P. aeruginosa***

322 The *S. pyogenes* Cas9 gene was cloned into a pUC18T-Ara integration vector and then inserted  
323 into the attTn7 locus of PAO1. A single guide RNA scaffold was constructed based on a  
324 previous design<sup>34</sup> with internal Bsal cut sites to enable insertion of pre-annealed oligos for  
325 scarless sgRNA design. This sgRNA scaffold was amplified with primers p30T-gRNA\_Bsal and  
326 p30T-gRNA\_Bsal\_rev. The resulting product was inserted into the pHERD30T vector via  
327 Gibson assembly following backbone (pJW1) amplification by inverse PCR with primers  
328 gRNA\_Bsal-p30T and gRNA\_Bsal-p30T\_rev. The sgRNA scaffold was positioned into pJW1 so  
329 that following Bsal cleavage the spacer insert +1 position would coincide with the pBAD TSS  
330 +1 position. The resulting plasmid, pJB1, was Bsal digested (NEB) followed by ligation of  
331 indicated pre-annealed oligos. Table 3 contains a complete list of all target sequences. The  
332 sequence of the sgRNA construct with Bsal site locations is shown in Supplemental Table 3.

333

### 334 **Cas9 in vitro cleavage**

335 Cas9-based phage genome cleavage *in vitro* was conducted with purified Cas9 protein (NEB  
336 #M0386S), and the Cas9-gRNA-tracrRNA based cleavage reaction was then performed using  
337 according to the manufacturer's (NEB) instructions. Cas9 crRNAs (Supplemental Table 3) were  
338 ordered as Alt-R CRISPR-Cas9 crRNAs from IDT and utilized without further modification. The  
339 tracrRNA was amplified using primers tracrRNA-FOR and tracrRNA-REV from a plasmid  
340 (pBR62). The tracrRNA was produced through a T7 RNAP reactions using dsDNA encoding the  
341 tracrRNA downstream of a T7 RNAP promoter. Cas9 protein (NEB) was combined with pre-  
342 annealed crRNA and tracrRNA complex at a 1:1 molar ratio. The reaction was performed at 37  
343 °C for 4 hrs with 300 ng of  $\Phi$ KZ or DMS3 genomic DNA and the products were assessed by  
344 agarose gel electrophoresis. Two Cas9 guides were selected that would cleave at pos. 158,649  
345 and 168,715 of the  $\Phi$ KZ genome to liberate an ~10 kb fragment.



346

### 347 **Cas12a and crRNA design for PA expression**

348 The humanized allele of the *cpf1* gene of *Moraxella bovoculli* (MBO\_03467, KDN25524.1) was  
349 sub-cloned from pTE4495 (Addgene) into pUC18T-lac using primers pUC\_cpf1\_F and  
350 pUC\_cpf1\_R and inserted in the PAO1 chromosome as described above. A Cpf1 repeat-  
351 spacer-repeat pseudo-CRISPR array was synthesized as oligonucleotides, annealed, and  
352 ligated into a pHERD30T vector, digested with NcoI and HindIII. Spacer sequences were cloned  
353 into the resulting vector (pJB2) following BsaI digestion and ligation of pre-annealed spacer  
354 oligonucleotide pairs.

355

### 356 **Cas13a and crRNA design for PA expression**

357 The wild type allele of the *cas13* gene of *Listeria seeligeri* and *Leptotrichia shahii* were sub-  
358 cloned from p2CT-His-MBP-Lse\_C2c2\_WT and p2CT-His-MBP-Lsh\_C2c2\_WT (Addgene) into  
359 pUC18T-lac. LseCas13 and Lsh Cas13 were inserted in the PAO1 chromosome as described  
360 above. An Lse and an Lsh Cas13a repeat-spacer-repeat pseudo-CRISPR array were  
361 synthesized as oligonucleotides, annealed, and ligated into a pHERD30T vector, digested with  
362 NcoI and EcoRI. Spacer sequences were cloned into the resulting vectors (pSDM057 and  
363 pSDM070, respectively) following BsaI digestion and ligation of pre-annealed spacer  
364 oligonucleotide pairs. crRNA expression vectors were introduced into PAO1 *tn7::cas13<sup>Lse</sup>* and  
365 PAO1 *tn7::cas13<sup>Lsh</sup>*. The resulting strains were grown to saturation in LB at 37 °C. 4 mL of 0.7%  
366 agar, 10 mM MgSO<sub>4</sub>, 1 mM IPTG molten top agar were seeded with 100 µL saturated culture  
367 and spread on 20 mL 10 mM MgSO<sub>4</sub>, 50 µg/mL gentamicin, 0.1% (L)-arabinose, 1 mM IPTG LB  
368 agar plates. 2.5 µL 10-fold serial dilutions of bacteriophage JBD30 and ΦKZ were spotted on  
369 plates. Plates were incubated at 37 °C overnight and were imaged on the following day.

370

### 371 **Restriction-Modification Assay**

372 The PAO1 *hsdR* gene (PA2732) was knocked out using CRISPR-Cas9 and a targeted sgRNA.  
373 PAO1, PAK, and PAO1  $\Delta$ *hsdR* were grown to saturation in LB at 37 °C. 4 mL of 0.7% agar, 10  
374 mM MgSO<sub>4</sub> molten top agar were seeded with 100 µL saturated culture and spread on 20 mL  
375 10 mM MgSO<sub>4</sub> LB agar plates. 2.5 µL 10-fold serial dilutions of bacteriophage JBD30 and ΦKZ  
376 propagated on strain PAO1 and PAK were spotted on plates. Plates were incubated at 37°C  
377 overnight and were imaged the following day.

378

### 379 **Immunofluorescence**



380 Sample Growth

381 5 mL overnight cultures of a strain expressing Cas9 and an sgRNA targeting  $\Phi$ KZ (SDM065)  
382 and a strain expressing cMyc-ORF152 (bESN27) were grown at 30 °C in LB media with  
383 gentamicin. A 1:30 back-dilution of the overnight culture into LB was grown at 30 °C for 1 h.  
384 Protein and guide expression was induced with 0.1% arabinose and 0.5 mM IPTG, respectively.  
385 After 1 h of expression, an aliquot of uninfected cells was fixed while the remaining cultures  
386 were infected with  $\Phi$ KZ using MOI 1.5. Infected cell aliquots were collected and fixed at 60 mpi.  
387

388 Fixation

389 This protocol was adapted from ref. 35. Samples were fixed with 5X Fix Solution (12.5%  
390 paraformaldehyde, 150 mM KPO<sub>4</sub>, pH 7.2) and incubating for 15 minutes at room temperature  
391 followed by 20 minutes on ice. Samples were then washed in PBS 3 times and finally  
392 resuspended in GTE (50 mM glucose, 10 mM EDTA, pH 8.0, 20 mM Tris-HCl, pH 7.65) with 10  
393 ug/mL lysozyme. Resuspended cells were transferred to polylysinated coverslips and dried.  
394 Once dry, coverslips were incubated in cold methanol for 5 minutes followed by cold acetone for  
395 5 minutes. Cells were rehydrated by a rinse in PBS followed by a 3-minute incubation in PBS +  
396 2% BSA blocking solution. Cells were incubated with a 1:50 dilution of primary antibody (Cas9  
397 (7A9-3A3): sc-517386 or cMyc (9E10): sc-40) in PBS + 2% BSA for 1 hr followed by 3, 7 minute  
398 washes in fresh PBS + 2% BSA. Coverslips were then incubated in the dark for 1 hr with  
399 secondary antibody (goat anti-mouse Alexa Fluor 555, Life Technologies A-21424) diluted 1:500  
400 in PBS + 2% BSA. DAPI was added for the final 10 minutes of the incubation. Cells were  
401 washed in PBS 3 times for 7 minutes. Coverslips were then placed on slides using mounting  
402 media (v/v 90% glycerol, v/v 10% Tris pH 8.0 and w/v 0.5% propyl-gallate) and sealed with clear  
403 nail polish.

404

405 Microscopy and Analysis

406 Images were collected using a Zeiss Axiovert 200M microscope.

407 **REFERENCES**

- 408 1. Koonin, E. V., Makarova, K. S. & Wolf, Y. I. Evolutionary Genomics of Defense Systems  
409 in Archaea and Bacteria. *Annu Rev Microbiol* **71**, annurev-micro-090816-093830  
410 (2017).
- 411 2. Labrie, S. J., Samson, J. E. & Moineau, S. Bacteriophage resistance mechanisms. *Nat*  
412 *Rev Micro* **8**, 317–327 (2010).
- 413 3. Doron, S. *et al.* Systematic discovery of antiphage defense systems in the microbial  
414 pangenome. *Science* **359**, eaar4120 (2018).
- 415 4. Hille, F. *et al.* The Biology of CRISPR-Cas: Backward and Forward. *Cell* **172**, 1239–1259  
416 (2018).
- 417 5. Abudayyeh, O. O. *et al.* C2c2 is a single-component programmable RNA-guided RNA-  
418 targeting CRISPR effector. *Science* **353**, aaf5573 (2016).
- 419 6. Hale, C. R. *et al.* RNA-Guided RNA Cleavage by a CRISPR RNA-Cas Protein Complex.  
420 *Cell* **139**, 945–956 (2009).
- 421 7. Mulepati, S. & Bailey, S. Structural and biochemical analysis of nuclease domain of  
422 clustered regularly interspaced short palindromic repeat (CRISPR)-associated protein 3  
423 (Cas3). *J Biol Chem* **286**, 31896–31903 (2011).
- 424 8. Garneau, J. E. *et al.* The CRISPR/Cas bacterial immune system cleaves bacteriophage  
425 and plasmid DNA. *Nature* **468**, 67–71 (2010).
- 426 9. Zetsche, B. *et al.* Cpf1 Is a Single RNA-Guided Endonuclease of a Class 2 CRISPR-Cas  
427 System. *Cell* **163**, 759–771 (2015).
- 428 10. Barrangou, R. *et al.* CRISPR provides acquired resistance against viruses in prokaryotes.  
429 *Science* **315**, 1709–1712 (2007).
- 430 11. Brouns, S. J. J. *et al.* Small CRISPR RNAs guide antiviral defense in prokaryotes.  
431 *Science* **321**, 960–964 (2008).
- 432 12. Bondy-Denomy, J., Pawluk, A., Maxwell, K. L. & Davidson, A. R. Bacteriophage genes  
433 that inactivate the CRISPR/Cas bacterial immune system. *Nature* **493**, 429–432 (2013).
- 434 13. Pawluk, A., Bondy-Denomy, J., Cheung, V. H. W., Maxwell, K. L. & Davidson, A. R. A  
435 new group of phage anti-CRISPR genes inhibits the type I-E CRISPR-Cas system of  
436 *Pseudomonas aeruginosa*. *mBio* **5**, e00896–e00896–14 (2014).
- 437 14. Pawluk, A. *et al.* Inactivation of CRISPR-Cas systems by anti-CRISPR proteins in diverse  
438 bacterial species. *Nature Microbiology* **1**, 1–6 (2016).
- 439 15. van Belkum, A. *et al.* Phylogenetic Distribution of CRISPR-Cas Systems in Antibiotic-  
440 Resistant *Pseudomonas aeruginosa*. *mBio* **6**, e01796–15 (2015).
- 441 16. Makarova, K. S. *et al.* An updated evolutionary classification of CRISPR-Cas systems.  
442 *Nat Rev Micro* **13**, 722–736 (2015).
- 443 17. Pawluk, A. *et al.* Naturally Occurring Off-Switches for CRISPR-Cas9. *Cell* **167**, 1829–  
444 1838.e9 (2016).
- 445 18. Rauch, B. J. *et al.* Inhibition of CRISPR-Cas9 with Bacteriophage Proteins. *Cell* **168**,  
446 150–158.e10 (2017).
- 447 19. Bryson, A. L. *et al.* Covalent Modification of Bacteriophage T4 DNA Inhibits CRISPR-  
448 Cas9. *mBio* **6**, e00648–15–9 (2015).
- 449 20. Strotskaya, A. *et al.* The action of *Escherichia coli* CRISPR-Cas system on lytic  
450 bacteriophages with different lifestyles and development strategies. *Nucleic Acids*  
451 *Research* **45**, 1946–1957 (2017).
- 452 21. Vlot, M. *et al.* Bacteriophage DNA glucosylation impairs target DNA binding by type I and  
453 II but not by type V CRISPR-Cas effector complexes. *Nucleic Acids Research* **46**, 873–  
454 885 (2018).
- 455 22. Huang, L. H., Farnet, C. M., Ehrlich, K. C. & Ehrlich, M. Digestion of highly modified  
456 bacteriophage DNA by restriction endonucleases. *Nucleic Acids Research* **10**, 1579–

- 457 1591 (1982).
- 458 23. Kaplan, D. A. & Nierlich, D. P. Cleavage of Nonglycosylated Bacteriophage T4  
459 deoxyribonucleic acid by Restriction Endonuclease Eco RI. *J Biol Chem* **250**, 2395–2397  
460 (1975).
- 461 24. Cohen-Karni, D. *et al.* The MspJI family of modification-dependent restriction  
462 endonucleases for epigenetic studies. *Proceedings of the National Academy of Sciences*  
463 **108**, 11040–11045 (2011).
- 464 25. Kraemer, J. A. *et al.* A phage tubulin assembles dynamic filaments by an atypical  
465 mechanism to center viral DNA within the host cell. *Cell* **149**, 1488–1499 (2012).
- 466 26. Erb, M. L. *et al.* A bacteriophage tubulin harnesses dynamic instability to center DNA in  
467 infected cells. *Elife* **3**, e03197 (2014).
- 468 27. Zehr, E. A. *et al.* The structure and assembly mechanism of a novel three-stranded  
469 tubulin filament that centers phage DNA. *Structure* **22**, 539–548 (2014).
- 470 28. Chaikerasitak, V. *et al.* Assembly of a nucleus-like structure during viral replication in  
471 bacteria. *Science* **355**, 194–197 (2017).
- 472 29. Chaikerasitak, V. *et al.* The Phage Nucleus and Tubulin Spindle Are Conserved among  
473 Large Pseudomonas Phages. *Cell Rep* **20**, 1563–1571 (2017).
- 474 30. Gootenberg, J. S. *et al.* Nucleic acid detection with CRISPR-Cas13a/C2c2. *Science* **356**,  
475 eaam9321–442 (2017).
- 476 31. Mesyanzhinov, V. V. *et al.* The genome of bacteriophage phi KZ of *Pseudomonas*  
477 *aeruginosa*. *Journal of Molecular Biology* **317**, 1–19 (2002).
- 478 32. Choi, K.-H. & Schweizer, H. P. mini-Tn7 insertion in bacteria with single attTn7 sites:  
479 example *Pseudomonas aeruginosa*. *Nat Protoc* **1**, 153–161 (2006).
- 480 33. Cady, K. C., Bondy-Denomy, J., Heussler, G. E., Davidson, A. R. & O'Toole, G. A. The  
481 CRISPR/Cas adaptive immune system of *Pseudomonas aeruginosa* mediates resistance  
482 to naturally occurring and engineered phages. **194**, 5728–5738 (2012).
- 483 34. Jinek, M. *et al.* A Programmable Dual-RNA-Guided DNA Endonuclease in Adaptive  
484 Bacterial Immunity. *Science* **337**, 816–821 (2012).
- 485 35. Cowles, K. N. *et al.* The putative Poc complex controls two distinct *Pseudomonas*  
486 *aeruginosa* polar motility mechanisms. *Molecular Microbiology* **90**, 923–938 (2013).
- 487 36. Bondy-Denomy, J. *et al.* Prophages mediate defense against phage infection through  
488 diverse mechanisms. *The ISME Journal* **10**, 2854–2866 (2016).
- 489 37. Kropinski, A. M. Sequence of the genome of the temperate, serotype-converting,  
490 *Pseudomonas aeruginosa* bacteriophage D3. **182**, 6066–6074 (2000).
- 491 38. Qiu, D., Damron, F. H., Mima, T., Schweizer, H. P. & Yu, H. D. PBAD-Based Shuttle  
492 Vectors for Functional Analysis of Toxic and Highly Regulated Genes in *Pseudomonas*  
493 and *Burkholderia* spp. and Other Bacteria. *Applied and Environmental Microbiology* **74**,  
494 7422–7426 (2008).
- 495 39. Choi, K.-H. & Schweizer, H. P. mini-Tn7 insertion in bacteria with single attTn7 sites:  
496 example *Pseudomonas aeruginosa*. *Nat Protoc* **1**, 153–161 (2006).
- 497 40. Choi, K.-H. *et al.* Genetic tools for select-agent-compliant manipulation of *Burkholderia*  
498 *pseudomallei*. *Applied and Environmental Microbiology* **74**, 1064–1075 (2008).
- 499

501 **Supplementary Information**

502 **Strains, Plasmids, and Oligonucleotides**

503 **Supplemental Table 1. Phage and Strains**

| Name   | Source                           | Reference                          |
|--------|----------------------------------|------------------------------------|
| ΦKZ    | Davidson Lab                     | 31                                 |
| DMS3m  | O'Toole Lab                      | 33                                 |
| JBD30  | Davidson Lab                     | 36                                 |
| F8     | Davidson Lab                     | Unpublished<br>Accession: DQ163917 |
| D3     | Davidson Lab                     | 37                                 |
| JBD68  | Davidson Lab                     | 36                                 |
|        |                                  |                                    |
|        | Genotype                         | Reference                          |
| JW31   | PAO1 tn7::I-C/Cas3 <sup>PA</sup> | This study                         |
| JB10   | PAO1 tn7::cas9 <sup>Spy</sup>    | This study                         |
| JB90   | PAO1 tn7::cas12a <sup>Mb</sup>   | This study                         |
| SDM084 | PAO1 tn7::cas13 <sup>Lse</sup>   | This study                         |
| SDM020 | PAO1 $\Delta$ hsdR               | This study                         |

504

505

506

**Supplemental Table 2. Plasmids**

| Name       | Information                                                                                                               | Ref.       |
|------------|---------------------------------------------------------------------------------------------------------------------------|------------|
| pHERD30T   | Arabinose inducible, gentamicin resistant shuttle vector                                                                  | 38         |
| pUC18T-Lac | IPTG inducible, Amp <sup>R</sup> /Gent <sup>R</sup> , Tn7 integrative plasmid with FRT sites flanking gentamicin cassette | 39         |
| pTNS3      | Expresses tnsABCD for flipping out cassette flanked by FRT sites                                                          | 40         |
| pBR62      | Contains Spy Cas9 tracrRNA sequence                                                                                       | This study |
| pJW1       | pHERD30T with BsaI site at pos. 235 GAGACC mutated to GTGACC                                                              | This study |
| pJW13      | pJW1 with Type I-C pseudo-CRISPR array for spacer cloning                                                                 | This study |
| pJB1       | pJW1 with Type II-A sgRNA backbone at the +1 TSS of pBAD                                                                  | This study |
| pJB2       | pJW1 with Type V-A pseudo-CRISPR array for spacer cloning                                                                 | This study |
| pSDM057    | pJW1 with Type VI-A (LseCas13a) pseudo-CRISPR array for spacer cloning                                                    | This study |
| pSDM070    | pJW1 with Type VI-A (LshCas13a) pseudo-CRISPR array for spacer cloning                                                    | This study |

507

508

**Supplemental Table 3. Oligonucleotides, g-blocks, crRNAs**

| Name | Sequence | Notes |
|------|----------|-------|
|------|----------|-------|

|                                     |                                                                                                                            |                                                          |
|-------------------------------------|----------------------------------------------------------------------------------------------------------------------------|----------------------------------------------------------|
| I-C_Bsal_for                        | gatccGTCGCGCCCCGCACGGGCGCGTGGATTG<br>AAACgagaccTCTCTGGACAAAaggctc<br>GTCGCGCCCCGCACGGGCGCGTGGATTGAAAC<br>a                 | Underlined regions<br>indicate location of<br>Bsal sites |
| I-C_Bsal_rev                        | agcttGTTTCAATCCACGCGCCCCTGCGGGGCGC<br>GACgagaccTTTGTCCAGAGAggtctcGTTTCAATCC<br>ACGCGCCCCTGCGGGGCGCGACg                     | Underlined regions<br>indicate location of<br>Bsal sites |
| sgRNA scaffold<br>sequence          | ccatagagaccACGTACGTACggctcAGTTTTAGAGC<br>TAGAAATAGCAAGTTAAAATAAGGCTAGTCCGT<br>TATCAACTTGAAAAAGTGGCACCGAGTCGGTGC<br>TTTTTTT | Underlined regions<br>indicate location of<br>Bsal sites |
| p30T-gRNA_Bsal                      | ctctactgttctccatccatagagaccacgtacgtacg                                                                                     |                                                          |
| p30T-<br>gRNA_Bsal_rev              | gccccaaaaaacgggtccgggcaggataggtgaag                                                                                        |                                                          |
| gRNA_Bsal-p30T                      | atggagaaacagtagagagttgc                                                                                                    |                                                          |
| gRNA_Bsal-p30T-<br>rev              | accggtttttgggctag                                                                                                          |                                                          |
| Cpf1_crRNA_top                      | catgaaatttctactgtttgtagatGgagaccTCTCTGGACAAA<br>ggtctcGaaatttctactgtttgtagat                                               | Underlined regions<br>indicate location of<br>Bsal sites |
| Cpf1_crRNA_botto<br>m               | agctatctacaacagtagaaattCgagaccTTTGTCCAGA<br>GAggtctcCatctacaacagtagaaatt                                                   | Underlined regions<br>indicate location of<br>Bsal sites |
| tracrRNA-FOR                        | gaaattaatacagactcaactatagaaaacagcatagcaagttaaaa<br>a                                                                       | For T7 RNAP in<br>vitro rxn                              |
| tracrRNA-REV                        | aaaaaaagcaccgactcgggtccac                                                                                                  | For T7 RNAP in<br>vitro rxn                              |
| PTn7R                               | cacagcataactggactgaatttc                                                                                                   | Ref. 39                                                  |
| PglmS-down                          | gcacatcgggcgacgtgctctc                                                                                                     | Ref. 39                                                  |
| LseCas13a crRNA<br>Top              | catgggtaagagactacctctatatgaaagaggactaaaaccgag<br>accacgtacgtacgggtctccggtaagagactacctctatatgaaaga<br>ggactaaaacg           | Underlined regions<br>indicate location of<br>Bsal sites |
| LseCas13a crRNA<br>Bottom           | aattcgtttagtctctttcatatagaggtagtctctaccggagaccgta<br>cgtagctgggtctcgggttttagtctctttcatatagaggtagtctctacc                   | Underlined regions<br>indicate location of<br>Bsal sites |
| LshCas13a crRNA<br>Top              | catggggatttagaccacccaatatcgaaggggactaaaaccgag<br>accacgtacgtacgggtctccggatttagaccacccaatatcgaagg<br>ggactaaaacg            | Underlined regions<br>indicate location of<br>Bsal sites |
| LshCas13a crRNA<br>Bottom           | aattcgtttagtccccttcgatattggggtggtctaaatccggagaccgt<br>acgtacgtgggtctcgggttttagtccccttcgatattggggtggtctaaatc<br>cc          | Underlined regions<br>indicate location of<br>Bsal sites |
| <b>Alt-R CRISPR-<br/>Cas9 crRNA</b> |                                                                                                                            |                                                          |
| KZ (IV) – 1                         | rGrArArUrCrUrGrCrUrArArUrArArGrGrU<br>rUrCrArGrUrUrUrUrArGrArGrCrUrArUrGrC rU                                              | Pos. 158,649                                             |

|                |                                                                                        |              |
|----------------|----------------------------------------------------------------------------------------|--------------|
| KZ (IV) – 2    | rUrCrArCrCrArCrGrCrArUrUrArCrArUr<br>rCrArGrGrUrUrUrUrArGrArGrCrUrArUrGrC rU           | Pos. 168,715 |
| DMS3m (IV) - 1 | rGrCrC rGrArC rArUrU rUrUrC rCrArG rUrUrG<br>rGrCrG rUrUrU rUrArG rArGrC rUrArU rGrCrU | Pos. 17,751  |
| DMS3m (IV) - 2 | rUrCrA rCrGrA rCrGrA rCrCrC rArGrA rArGrC<br>rGrUrG rUrUrU rUrArG rArGrC rUrArU rGrCrU | Pos. 28,033  |

509  
510

#### Supplemental Table 4. Spacer sequences

| Phage (Type, #) | Sequence                           |
|-----------------|------------------------------------|
| JBD30 (I-C)     | AACCTCGCGGCATCCGCAACAACAACCCCGGCAA |
| D3 (I-C)        | ACGATTGCGGACATGGCAGGCTGCCGCTGCTGGA |
| F8 (I-C)        | GCCAATCGGCCGATAGATGAAGCTGTGGAGGGTC |
| JBD68 (I-C)     | AGCGGCGTGAGGTTGGACCTTGCTGCCGACCATT |
| ΦKZ (I-C, #1)   | TGGACTAACAAATACGCCTATATATTCCGATCCT |
| ΦKZ (I-C, #2)   | GAACTTGTATTTAACCCAAAGGTTTTTAAATGGT |
| ΦKZ (I-C, #3)   | CCCATTTATTATTTTCTTTATTTATCCAACCGTA |
| ΦKZ (I-C, #4)   | TAAAAGAAAATTATATAAATAGTATATTATGTG  |
| ΦKZ (I-C, #5)   | TTTACATTCTTCTAAACTAATATTTAATTCATCT |
| ΦKZ (I-C, #6)   | CATTATCATCTACCTCTTTTAATTTATCTTTAAT |
| ΦKZ (I-C, #7)   | CAAAGGATTATTTGATGTTGTGGTGAAAGAAAA  |
| ΦKZ (I-C, #8)   | GCCATTTTCTTTCACCACAACATCAAATAATCCT |
| ΦKZ (I-C, #9)   | AGATAATGGGGATATTTTGTATTTTGATAACAAG |
| ΦKZ (I-C, #10)  | TACTGGTACCCATAGAAGTTATTTTTACCAGCT  |
| ΦKZ (I-C, #11)  | ATTGAAATCAAGTAAAATCTCAAATGGAATCTGT |
| JBD30 (II-A)    | GGCATCCGCAACAACAACCC               |
| ΦKZ (II-A, #1)  | GAATCTGCTAATAAGGTTCA               |
| ΦKZ (II-A, #2)  | TCACCACGCATTACATCAGG               |
| ΦKZ (II-A, #3)  | AAATTATATTAATCACAATG               |
| ΦKZ (II-A, #4)  | ATATATTCCGATCCTTATCC               |
| ΦKZ (II-A, #5)  | AAACATCCTCATGATAACCA               |
| ΦKZ (II-A, #6)  | AGCAGTAGCTTGAGTTTGAA               |
| ΦKZ (II-A, #7)  | TTTTAGATGAAGTAAAAAAG               |
| ΦKZ (II-A, #8)  | CTATTACCATTTTCGTCAAT               |
| ΦKZ (II-A, #9)  | CTCATTTTTTATTCCCTACGT              |
| ΦKZ (II-A, #10) | AGAGAACTGTTTAAACACAA               |
| JBD30 (V-A, #1) | CGTTTTACCCACTGAGCGAACGC            |
| JBD30 (V-A, #2) | GCCCGTTTCGATACCGCACATA             |
| JBD30 (V-A, #3) | TACCGCGCCGCCCTTCTGGAGGA            |
| JBD30 (V-A, #4) | AAGGTGCCGCACGGTGTCCCAGT            |
| JBD30 (V-A, #5) | CGCATGACTCTCTATATGGGGCC            |
| ΦKZ (V-A, #1)   | TCACCACGCATTACATCAGGTGG            |
| ΦKZ (V-A, #2)   | GAATCTGCTAATAAGGTTTCATGG           |
| ΦKZ (V-A, #3)   | AATAGGAATATAGCTATGCTAAT            |
| ΦKZ (V-A, #4)   | TGTGTCTCTTTTCCAAATGCTTT            |
| ΦKZ (V-A, #5)   | GGGATTCAACTATTGGAAAAGCA            |
| ΦKZ (V-A, #6)   | GCTAGTTGTTTCATCAAATGATGA           |
| ΦKZ (V-A, #7)   | CTCATTAATAACAGATACTTTGT            |
| ΦKZ (V-A, #8)   | CTGGGCATTAATGACGATATATC            |
| ΦKZ (V-A, #9)   | TGCTCTAGTCCATACAGAAT               |



|                  |                           |
|------------------|---------------------------|
| ΦKZ (V-A, #10)   | TTACAGCCTCGTCAGACAGGTAA   |
| ΦKZ (V-A, #11)   | CCTAATGCATTCCATTTAAATAC   |
| PAO1 (VI-A, #1)  | TCAAATTACGCGCAGCAGCAAGAT  |
| PAO1 (VI-A, #2)  | CGGCCTGCAGGATGGCCTTGGTCA  |
| JBD30 (VI-A, #1) | GCGGCCAGCCCGGCCCTCGTCCA   |
| JBD30 (VI-A, #2) | GGCGCGTTGATGCGGACCTGGCCA  |
| JBD30 (VI-A, #3) | AATGCCCTTCTCCCGGCAAACCGT  |
| JBD30 (VI-A, #4) | TACCCGCAAGTTGTTGAGGGCTGA  |
| JBD30 (VI-A, #5) | GGTGCCGGCCGGCTTGATGCCCAT  |
| ΦKZ (VI-A, #1)   | GCAGGAGCAGTAGCTTGAGTTTGA  |
| ΦKZ (VI-A, #2)   | TCATTAGTTTCAACCCAGTATGAA  |
| ΦKZ (VI-A, #3)   | ACATAATCTTCAAATGCAGAAGCC  |
| ΦKZ (VI-A, #4)   | AACCAGCACCACCACAAAAGTAAA  |
| ΦKZ (VI-A, #5)   | AGAATTACTAGTGCATTTAGTACT  |
| ΦKZ (VI-A, #6)   | AACGATGTAAGGAGTGAAGTGC GG |
| ΦKZ (VI-A, #7)   | TAACAGCTTGTAGATAATAACCAG  |
| ΦKZ (VI-A, #8)   | GTCTGCAATAGTCTTCCGGATTATT |
| ΦKZ (VI-A, #9)   | AGGTTAGCATTGGAGTTACCCATT  |
| ΦKZ (VI-A, #10)  | CAGCACCTTTGGAAACTACCCAAT  |
| ΦKZ (VI-A, #11)  | GCTTCCATAGTAACTAAGTATGCT  |

511  
512
